# Supplementary material for: Fluorescent PEI@Pd nanoclusters: facile synthesis and application
Source: Royal Society of Chemistry journal article supplement (doi:10.1039/d1ra06307c), 2021-01-01
Supplement: d1ra06307c1.pdf [file d1ra06307c1.pdf]

# Supporting Information

## Fluorescent PEI@Pd nanoclusters: facile synthesis and application

Wen Wen <sup>a</sup>, Zhongping Li <sup>a\*</sup>, Xu Wang <sup>b</sup>, Xiaoyan Du <sup>a</sup>, Guangming Wen <sup>a,c\*</sup>, Li Li <sup>d\*</sup>

<sup>a</sup> *Institute of Environmental Science, School of Chemistry and Chemical Engineering, Shanxi University, Taiyuan 030006, China. E-mail: z1104@sxu.edu.cn*

<sup>b</sup> *Shanxi Research Center for Information and Strategy of Science and Technology, Taiyuan 030024 China.*

<sup>c</sup> *School of Chemistry and Chemical Engineering, Jinzhong University, Jinzhong, 030619, China*

<sup>d</sup> *First Hospital of Shanxi Medical University, Taiyuan 030001, China*

Corresponding Author: [z1104@sxu.edu.cn](mailto:z1104@sxu.edu.cn) (Zhongping Li)  
[gmw@sxu.edu.cn](mailto:gmw@sxu.edu.cn) (Guangming Wen)  
[lili673213@163.com](mailto:lili673213@163.com) (Li Li)

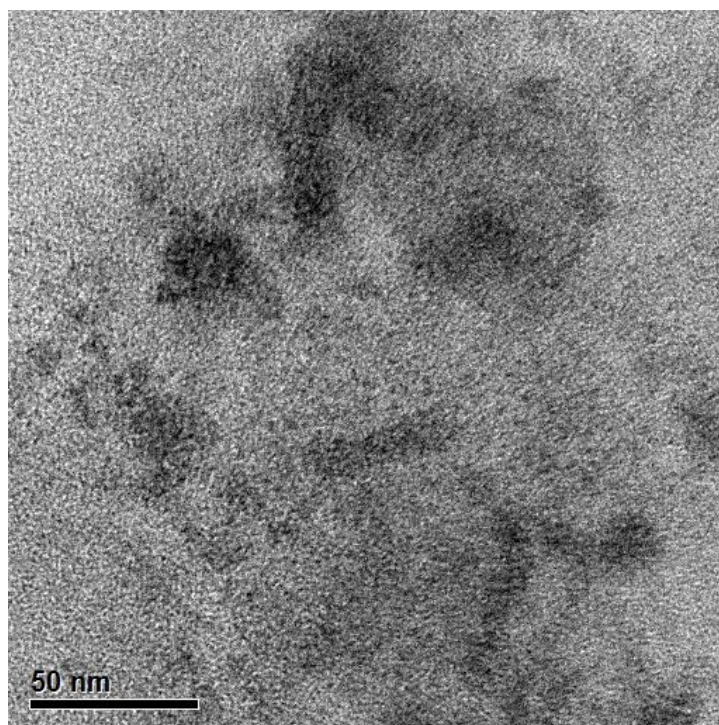

Fig. S1 The TEM image of Pd nanoclusters after reaction

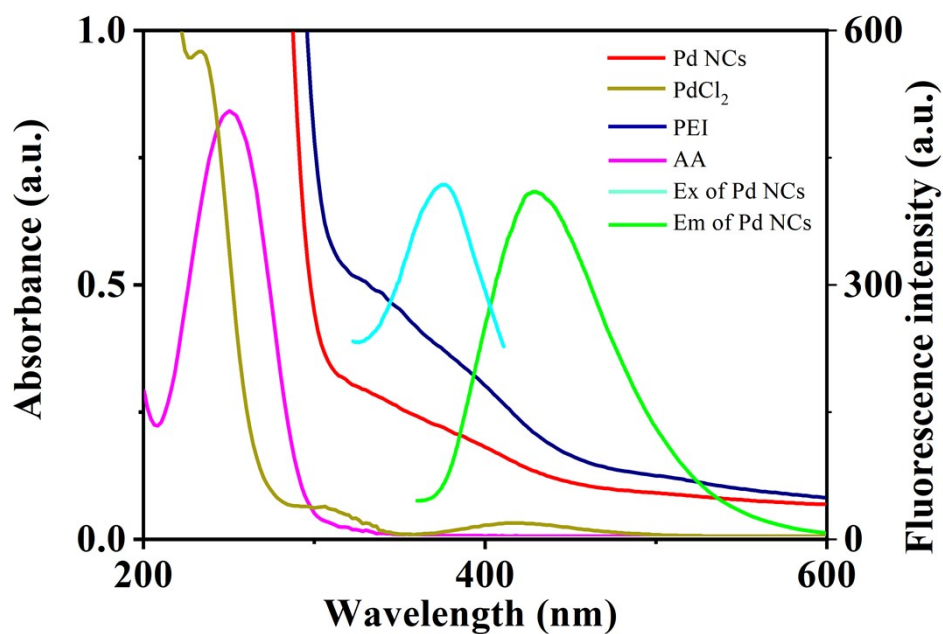

Fig. S2 The UV-Vis spectrum of ascorbic acid (AA), PEI, Pd nanoclusters and the fluorescence excitation (EX) and emission (EM) spectrum of Pd nanoclusters

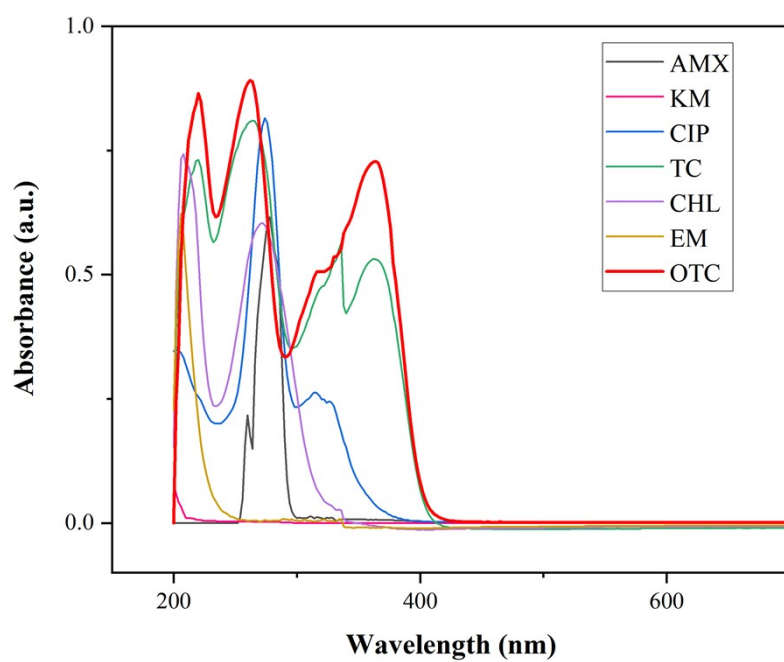

Fig. S3 the UV-Vis spectra of OTC and potential interferents
